# Supplementary material for: First worldwide multicenter validation of the POLARIS preclinical polarizer across biological models and imaging paradigms
Source: Research Square preprint supplement (doi:10.21203/rs.3.rs-9996713/v1), 2026-07-05
Supplement: Supplementary file 1 [file 60a1b2f22fe6316486af168b.docx]

**Supplementary Figures**

**
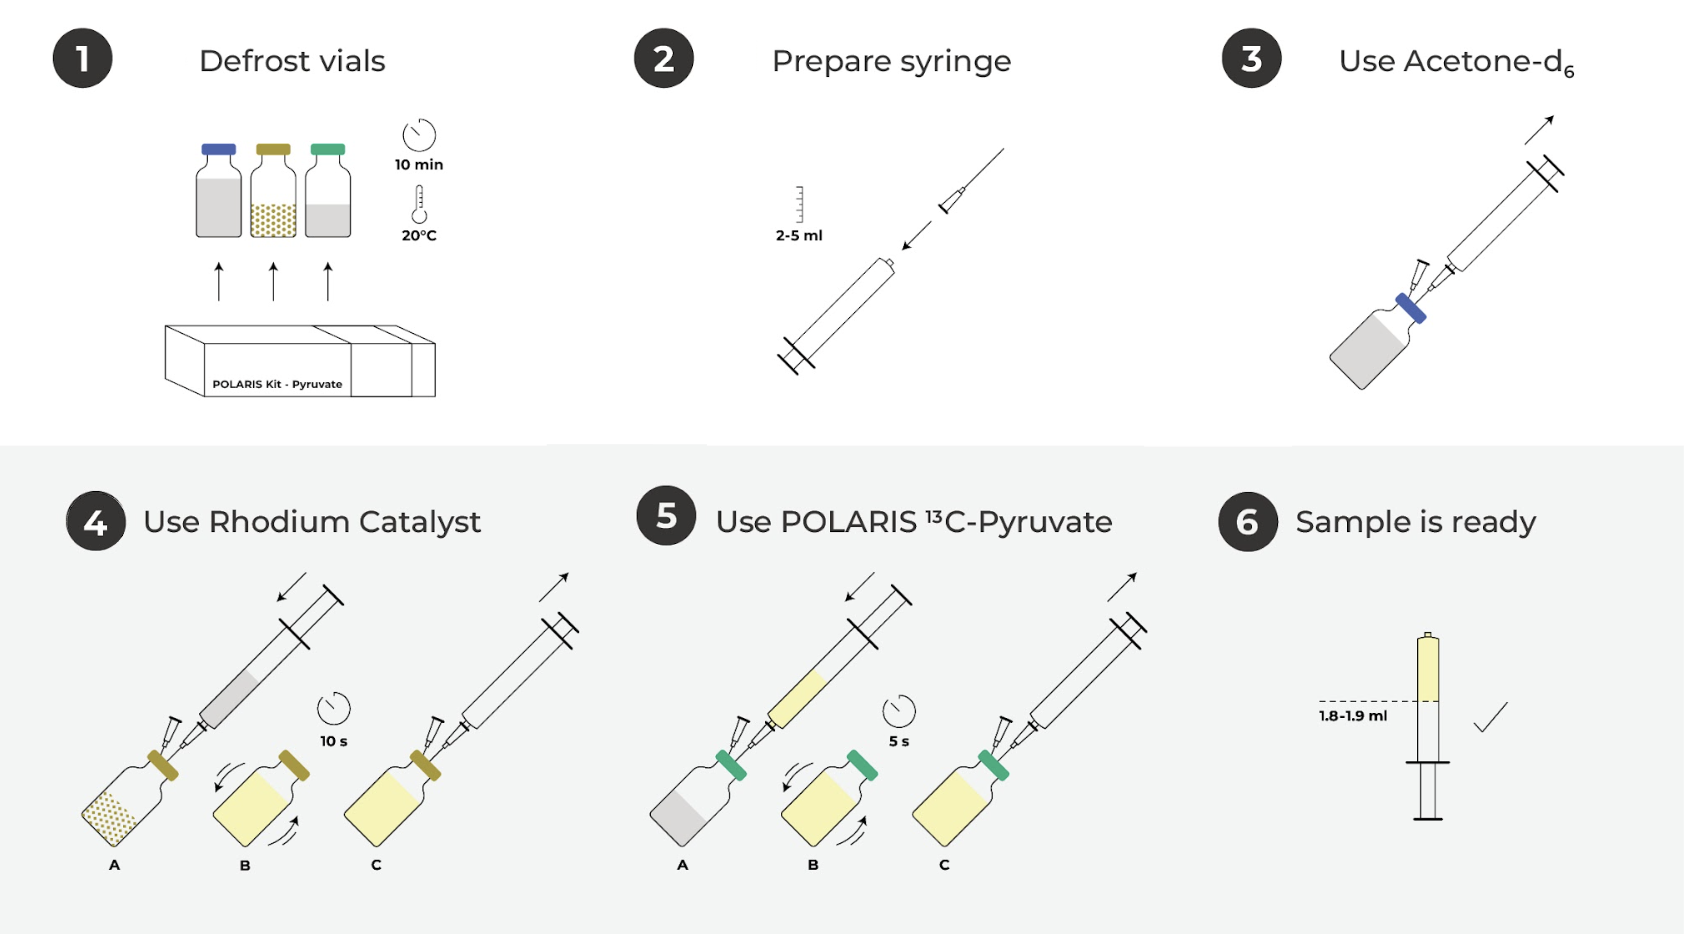
**

**Figure S1.** **Sample preparation workflow for production of the hyperpolarization precursor solution.** Reagent vials stored at −20 °C are first defrosted. A syringe is prepared with the appropriate cannula for sequential reagent transfer. The contents of the acetone-d6 vial are transferred by syringe into the rhodium catalyst vial and mixed by shaking. The combined solution is then drawn into a syringe and transferred into the vinyl pyruvate ester vial, followed by further mixing. The resulting solution, containing all three reagents, is drawn into a syringe to form the precursor solution, which is subsequently loaded into the POLARIS Preclinical polarizer.
